# Supplementary material
Source: PubMed Central journal article supplement (PMC2816189)
Supplement: supp_123_3_460__1.pdf [file supp_123_3_460__1.pdf]

---

**Table S1. Nucleotide sequences of the primers for preparation of the dsRNA**

---

| Gene (CG number)         | Forward primer                                | Reverse primer                                 |
|--------------------------|-----------------------------------------------|------------------------------------------------|
| <b>GGA</b> (CG3002)      | taatacgactcactatagggagaACAGTAGCTAGTTCAGTG     | taatacgactcactatagggagaCTCTGGCGCCTTTATGTG      |
| <b>Lerp</b> (CG31002)    | taatacgactcactatagggagaATGCGTTGCAGTTTGC       | taatacgactcactatagggagaTGGGCATCCAAAGTATA       |
| <b>AP47</b> (CG9388)     | taatacgactcactatagggagaGTGACCAATGCAGTATCC     | taatacgactcactatagggagaGATTTCCACGTTGTTGGC      |
| <b>AP50</b> (CG7057)     | taatacgactcactatagggagaGAGGTGATGCAATCCTACTTCG | taatacgactcactatagggagaTACGACTTCATTACCACCTTGC  |
| <b>cm</b> (CG3035)       | taatacgactcactatagggagaGGTATACTTTCCTGATTCGGC  | taatacgactcactatagggagaGACTGCTGCATTAAGTTATCCG  |
| <b>Arf51F</b> (CG8156)   | taatacgactcactatagggagaTTCTGTACAAACTGAAACTTGG | taatacgactcactatagggagaGCTTGTTAGCAAATATCAGTATG |
| <b>Arf72A</b> (CG6025)   | taatacgactcactatagggagaATAGAGGAGTTGATGCGC     | taatacgactcactatagggagaGGCTCGCTTGAAATCAGA      |
| <b>Arf79F</b> (CG8385)   | taatacgactcactatagggagaATAGAGGAGTTGATGCGC     | taatacgactcactatagggagaGGCTCGCTTGAAATCAGA      |
| <b>Arf84F</b> (CG7435)   | taatacgactcactatagggagaATAATGCCGGCAAGACGA     | taatacgactcactatagggagaCTTTAATTTTCGTTGGATGAGAG |
| <b>Arf102F</b> (CG11027) | taatacgactcactatagggagaCAGCTCCAGGAGGATGAACT   | taatacgactcactatagggagaTCCTTCATAAAGACCGTGCC    |

The T7 promoter sequence and gene-specific sequence are indicated in lower and upper case, respectively
